# Supplementary material
Source: PubMed Central journal article supplement (PMC6652188)
Supplement: NIHMS1040803-supplement-SI.pdf [file NIHMS1040803-supplement-SI.pdf]

## Supporting Information: A model for risk-based screening and prioritization of human exposure to chemicals from near-field sources

**Authors:** Li Li<sup>1</sup>, John N. Westgate<sup>2,#</sup>, Lauren Hughes<sup>2</sup>, Xianming Zhang<sup>1,2</sup>, Babak Givehchi<sup>1</sup>, Liisa Toose<sup>2</sup>, James M. Armitage<sup>3</sup>, Frank Wania<sup>1</sup>, Peter Egeghy<sup>4</sup>, Jon A. Arnot<sup>1,2,5\*</sup>

1. Department of Physical and Environmental Sciences, University of Toronto Scarborough, Toronto, ON, Canada, M1C 1A4
2. ARC Arnot Research and Consulting, Toronto, ON, Canada, M4M 1W4
3. AES Armitage Environmental Sciences, Inc., Ottawa, ON, Canada, K1L 8C3
4. Office of Research and Development, U.S. Environmental Protection Agency, Research Triangle Park, NC, United States, 27709
5. Department of Pharmacology and Toxicology, University of Toronto, ON, Canada, M5S 1A8

**Corresponding author:** Arnot, J. A., 36 Sproat Avenue, Toronto, Ontario, M4M 1W4, Tel: +1 (647)-225-3771; Email: [jon@arnotresearch.com](mailto:jon@arnotresearch.com)

# (J. N. W.) Current affiliation: Pest Management Regulatory Agency, Health Canada, Ottawa, ON, Canada

The Supporting Information contains 23 pages, 5 tables, 2 texts, and 3 figures.

### Table of Contents

|                                                                                                                                       |    |
|---------------------------------------------------------------------------------------------------------------------------------------|----|
| <b>Table S1</b> Summary of Z values ( $\text{mol m}^{-3} \text{Pa}^{-1}$ ) and relevant parameters exposure model. ....               | 2  |
| <b>Table S2</b> Summary of D values ( $\text{mol Pa}^{-1} \text{h}^{-1}$ ) and relevant parameters in the direct exposure model. .... | 4  |
| <b>Table S3</b> Information on 37 chemicals in Case 1 .....                                                                           | 6  |
| <b>Table S4</b> Sensitivities of modeled uptake rates of chemicals in personal care products to selected input parameters.....        | 9  |
| <b>Table S5</b> Information on 131 chemicals in Cases 2 and 3 .....                                                                   | 10 |
| <b>Text S1</b> Steady-state mass balance equations for compartments of hand, rest of skin, and human body.....                        | 16 |
| <b>Text S2</b> Algorithm for calculating absorption of direct skin application.....                                                   | 17 |
| <b>Figure S1</b> Graphical illustration of the applied fraction in the total absorbed amount.....                                     | 19 |
| <b>Figure S2</b> Relative importance of near-field exposure pathways in intake fractions of 131 chemicals in Case 2.....              | 20 |
| <b>Figure S3</b> Modeling population intake fraction (Tier 1 <i>iFs</i> ) on the coupled RAIDAR-ICE and RAIDAR models.....            | 21 |
| <b>Figure S4</b> Percentage contribution of diet to the population intake fractions of 131 chemicals in Case 3.....                   | 22 |

**Table S1** Summary of Z values (mol m<sup>-3</sup> Pa<sup>-1</sup>) and relevant parameters exposure model.

| Media                    | Z value                                                                                                                           | Parameters and Units                                                                                                                                                                                                                                                                                                                                                                                                                                                                                                                        |
|--------------------------|-----------------------------------------------------------------------------------------------------------------------------------|---------------------------------------------------------------------------------------------------------------------------------------------------------------------------------------------------------------------------------------------------------------------------------------------------------------------------------------------------------------------------------------------------------------------------------------------------------------------------------------------------------------------------------------------|
| Gaseous phase            | $Z_G = \frac{1}{R \cdot T}$                                                                                                       | <i>R</i> : Ideal Gas Law constant (8.314 Pa·m <sup>3</sup> mol <sup>-1</sup> ·K <sup>-1</sup> );<br><i>T</i> : Temperature (298.15 K);                                                                                                                                                                                                                                                                                                                                                                                                      |
| Particulate / dust phase | $Z_{P,i} = K_{PA,i} \cdot Z_G$                                                                                                    | <i>K</i> <sub>PA,<i>i</i></sub> : Dimensionless equilibrium particle-gas partition coefficient for particles of size fraction <i>i</i> . <i>K</i> <sub>PA,<i>i</i></sub> = <i>K</i> <sub>P,<i>i</i></sub> × ρ <sub>P</sub> , where <i>K</i> <sub>P,<i>i</i></sub> (m <sup>3</sup> μg <sup>-1</sup> ) describes the ratio of concentration in particulates of size fraction <i>i</i> to that in gaseous phase, which can be calculated according to ref. <sup>1</sup> , and ρ <sub>P</sub> is the density of particle (μg m <sup>-3</sup> ). |
| Water phase              | $Z_W = \frac{Z_G}{K_{AW}}$                                                                                                        | <i>K</i> <sub>AW</sub> : Dimensionless equilibrium air-water partition coefficient.                                                                                                                                                                                                                                                                                                                                                                                                                                                         |
| Lipid phase              | $Z_L = Z_W \cdot K_{OW}$                                                                                                          | <i>K</i> <sub>OW</sub> : Dimensionless equilibrium octanol-water partition coefficient.                                                                                                                                                                                                                                                                                                                                                                                                                                                     |
| Non-lipid organic matter | $Z_{NLOM} = 0.035 \cdot Z_W \cdot K_{OW}$                                                                                         | 0.035: proportionality constant for non-lipid organic matter                                                                                                                                                                                                                                                                                                                                                                                                                                                                                |
| Air                      | $Z_A = \left(1 - \sum_i v_{P,A,i}\right) \cdot Z_G + \sum_i (v_{P,A,i} \cdot Z_{P,i})$                                            | <i>v</i> <sub>P,A,<i>i</i></sub> : Volume fraction of particles of size fraction <i>i</i> in the bulk indoor air;                                                                                                                                                                                                                                                                                                                                                                                                                           |
| Carpet                   | $Z_C = v_{A,C} \cdot Z_G + \left(1 - v_{A,C} - \sum_i v_{P,C,i}\right) \cdot K_{CA} \cdot Z_G + \sum_i (v_{P,C,i} \cdot Z_{P,i})$ | <i>v</i> <sub>A,C</sub> : Volume fraction of air in the bulk carpet (0.89);<br><i>v</i> <sub>P,C,<i>i</i></sub> : Volume fraction of particles of size fraction <i>i</i> in the bulk carpet;<br><i>K</i> <sub>CA</sub> : Dimensionless partition coefficient between carpet and air;                                                                                                                                                                                                                                                        |
| PUF                      | $Z_U = v_{A,U} \cdot Z_G + \left(1 - v_{A,U} - \sum_i v_{P,U,i}\right) \cdot K_{UA} \cdot Z_G + \sum_i (v_{P,U,i} \cdot Z_{P,i})$ | <i>v</i> <sub>A,U</sub> : Volume fraction of air in the PUF(0.98);<br><i>v</i> <sub>P,U,<i>i</i></sub> : Volume fraction of particles of size fraction <i>i</i> in the bulk PUF;<br><i>K</i> <sub>UA</sub> : Dimensionless partition coefficient between PUF and air;                                                                                                                                                                                                                                                                       |

|                                                                       |                                                                                                            |                                                                                                                                                                                                                            |
|-----------------------------------------------------------------------|------------------------------------------------------------------------------------------------------------|----------------------------------------------------------------------------------------------------------------------------------------------------------------------------------------------------------------------------|
| Vinyl floor                                                           | $Z_F = \left(1 - \sum_i v_{P,F,i}\right) \cdot K_{FA} \cdot Z_G + \sum_i (v_{P,F,i} \cdot Z_{P,i})$        | $v_{P,F,i}$ : Volume fraction of particles of size fraction $i$ in the bulk vinyl floor;<br>$K_{FA}$ : Dimensionless partition coefficient between vinyl floor and air;                                                    |
| Organic Film<br>( $j$ = vertical, down-facing, or up-facing surfaces) | $Z_{Mj} = \left(1 - \sum_i v_{P,M,i,j}\right) \cdot K_{MA} \cdot Z_G + \sum_i (v_{P,M,i,j} \cdot Z_{P,i})$ | $v_{P,M,i,j}$ : Volume fraction of particles of size fraction $i$ in the bulk organic film $j$ ;<br>$K_{MA}$ : Dimensionless partition coefficient between organic film and air; Calculated according to ref. <sup>2</sup> |
| Human body                                                            | $Z_H = Z_L \cdot v_{L,H} + Z_{NLOM} \cdot v_{NLOM,H} + Z_W \cdot v_{W,H}$                                  | $v_{L,H}$ , $v_{NLOM,H}$ , $v_{W,H}$ : Volume fractions of lipid, non-lipid organic matter, and water, respectively, in human body.                                                                                        |
| Hands                                                                 | $Z_{Ha} = Z_L \cdot v_{L,Ha} + Z_W \cdot v_{W,Ha}$                                                         | $v_{L,Ha}$ , $v_{W,Ha}$ : Volume fractions of lipid and water, respectively, in hands.                                                                                                                                     |
| Rest of skin                                                          | $Z_S = Z_L \cdot v_{L,S} + Z_W \cdot v_{W,S}$                                                              | $v_{L,S}$ , $v_{W,S}$ : Volume fractions of lipid and water, respectively, in skin.                                                                                                                                        |

**Table S2** Summary of D values (mol Pa<sup>-1</sup> h<sup>-1</sup>) and relevant parameters in the direct exposure model.

| Process                                | Equation                                                                                                                                   | Parameter definition                                                                                                                                                                                                                                                                                                                                                                                                                                                                                                                                                                                                 |
|----------------------------------------|--------------------------------------------------------------------------------------------------------------------------------------------|----------------------------------------------------------------------------------------------------------------------------------------------------------------------------------------------------------------------------------------------------------------------------------------------------------------------------------------------------------------------------------------------------------------------------------------------------------------------------------------------------------------------------------------------------------------------------------------------------------------------|
| Inhalation of indoor air to human body | $D_{\text{ihH}} = G_V \cdot \tau \cdot \left( Z_G \cdot E_R + \sum_i (Z_{P,i} \cdot v_{P,A,i} \cdot d_{P,i}) \right)$                      | <p><math>G_V</math>: Gross flow rate for exchange with the environment (m<sup>3</sup> h<sup>-1</sup>);</p> <p><math>\tau</math>: Fraction of time spent indoors (unitless);</p> <p><math>E_R</math>: Absorption efficiency via respiratory tract (unitless); <math>E_R=100\%</math> in Tier 0 mode and <math>E_R=70\%</math> in Tier 1 mode.</p> <p><math>v_{P,A,i}</math>: Volume fraction of particles of size fraction <math>i</math> in the indoor air (unitless);</p> <p><math>d_{P,i}</math>: Deposition fraction of particles of size fraction <math>i</math> in the human respiratory system (unitless).</p> |
| Dermal permeation into human body      | $D_{YH} = A_Y \cdot K_P \cdot Z_W$ <p>(Y = hand, rest of skin)</p>                                                                         | <p><math>A_Y</math>: Surface area of Y (hand or rest of skin) (m<sup>2</sup>);</p> <p><math>K_P</math>: Aqueous skin permeation coefficient, i.e., measured in water (m h<sup>-1</sup>); Calculated using the method by ten Berge.<sup>3</sup> For skin permeation coefficients measured in the bulk skin, <math>K_P</math> should be multiplied with Z value of the bulk skin (<math>Z_S</math>).</p>                                                                                                                                                                                                               |
| Non-dietary ingestion into human body  | $D_{\text{moH}} = n \cdot A_{\text{lip}} \cdot d_{\text{Ha}} \cdot TE_{\text{moH}} \cdot Z_{\text{Ha}}$                                    | <p><math>n</math>: Frequency of hand-to-mouth contact events per hour (h<sup>-1</sup>);</p> <p><math>A_{\text{lip}}</math>: Area of lip (m<sup>2</sup>);</p> <p><math>d_{\text{Ha}}</math>: Thickness of the lipid layer on the hand (m);</p> <p><math>TE_{\text{moH}}</math>: Transfer efficiency from hand to mouth (unitless).</p>                                                                                                                                                                                                                                                                                |
| Contact between surface and hands      | $D_{X\text{-Ha}} = n \cdot A_{\text{palm}} \cdot d_X \cdot TE_{X\text{-Ha}} \cdot Z_X$ <p>(X = carpet, PUF, vinyl floor, organic film)</p> | <p><math>n</math>: Frequency of surface-to hand contact events per hour (h<sup>-1</sup>);</p> <p><math>A_{\text{palm}}</math>: Area of palms (m<sup>2</sup>);</p> <p><math>d_X</math>: Thickness of surface X (m);</p> <p><math>TE_{X\text{-Ha}}</math>: Transfer efficiency from X to hand (unitless).</p>                                                                                                                                                                                                                                                                                                          |
| Air diffusion to skin                  | $D_{\text{diS}} = MTC_A \cdot A_S \cdot Z_G$                                                                                               | <p><math>MTC_A</math>: Mass transfer coefficient of the chemical in air (m h<sup>-1</sup>);</p> <p><math>A_S</math>: Area of skin (m<sup>2</sup>).</p>                                                                                                                                                                                                                                                                                                                                                                                                                                                               |
| Fecal egestion from                    | $D_{\text{eH}} = \frac{E_D \cdot G_D \cdot Z_D}{Q}$                                                                                        | <p><math>E_D</math>: Absorption efficiency via gastrointestinal tract (unitless);</p>                                                                                                                                                                                                                                                                                                                                                                                                                                                                                                                                |

| Process                                         | Equation                                                        | Parameter definition                                                                                                                                                                                                    |
|-------------------------------------------------|-----------------------------------------------------------------|-------------------------------------------------------------------------------------------------------------------------------------------------------------------------------------------------------------------------|
| human body                                      |                                                                 | $G_D$ : Ingestion rate ( $\text{m}^3 \text{h}^{-1}$ )<br>$Z_D$ : Weighted sum of Z values of all ingestion items ( $\text{mol m}^{-3} \text{Pa}^{-1}$ )<br>$Q$ : Theoretical maximum biomagnification factor (unitless) |
| Growth dilution in human body                   | $D_{gH} = G_G \cdot Z_H$                                        | $G_G$ : Growth rate ( $\text{m}^3 \text{h}^{-1}$ )                                                                                                                                                                      |
| Biotransformation in human body                 | $D_{mH} = V_B \cdot Z_H \cdot \ln 2 / \text{HL}_{\text{human}}$ | $V_B$ : Volume of human ( $0.07 \text{ m}^3$ );<br>$\text{HL}_{\text{human}}$ : Biotransformation half-life in human body (h)                                                                                           |
| Urinary excretion from human body               | $D_{urH} = E_U \cdot G_U \cdot Z_W$                             | $E_U$ : Absorption efficiency during urinary excretion (unitless); Assumed to be 100%;<br>$G_U$ : Urinary excretion rate ( $\text{m}^3 \text{h}^{-1}$ ); Assumed to equal the drinking rate used in RAIDAR.             |
| Exhalation excretion from human body            | $D_{reH} = G_V \cdot Z_G \cdot E_R$                             |                                                                                                                                                                                                                         |
| Elimination via handwashing and bathing         | $D_{wH} = F_{wH} \cdot RE \cdot V_L \cdot Z_L$                  | $F_{wH}$ : Frequency of handwashing or bathing per hour ( $\text{h}^{-1}$ );<br>$RE$ : Removal efficiency by handwashing or bathing;<br>$V_L$ : Volume of lipids in hands/skin;                                         |
| Elimination via skin cell loss in hand and skin | $D_{clY} = F_R \cdot V_L \cdot Z_L$<br>(Y= hand, rest of skin)  | $F_R$ : Frequency of cell regeneration per hour ( $\text{h}^{-1}$ ).                                                                                                                                                    |

**Table S3** Information on 37 chemicals in Case 1

| CAS#       | Name                            | Usage category <sup>(1)</sup> | Chemical properties <sup>(2)</sup> |              |              |                          | Emission rate <sup>(3)</sup>              | Application rate                     |                    |
|------------|---------------------------------|-------------------------------|------------------------------------|--------------|--------------|--------------------------|-------------------------------------------|--------------------------------------|--------------------|
|            |                                 |                               | MW<br>(g mol <sup>-1</sup> )       | log $K_{OW}$ | log $K_{OA}$ | HL <sub>Air</sub><br>(h) | ER <sub>Air</sub><br>(g h <sup>-1</sup> ) | Apparent AR<br>(ng h <sup>-1</sup> ) | $t_{exp}$<br>(min) |
| 90-15-3    | 1-Naphthol                      | chemicals in PCPs             | 144.2                              | 2.9          | 8.5          | 2.1                      | N.A.                                      | 4.3×10 <sup>4</sup>                  | 30                 |
| 131-57-7   | 2-Hydroxy-4-methoxybenzophenone | chemicals in PCPs             | 228.3                              | 3.8          | 10.0         | 71.2                     | N.A.                                      | 9.0×10 <sup>4</sup>                  | 1440               |
| 91-20-3    | Naphthalene                     | chemicals in PCPs             | 128.2                              | 3.3          | 5.2          | 52.4                     | N.A.                                      | 7.5×10 <sup>2</sup>                  | 30                 |
| 94-13-3    | Propyl paraben                  | chemicals in PCPs             | 180.2                              | 3.0          | 9.6          | 60.9                     | N.A.                                      | 6.0×10 <sup>4</sup>                  | 1440               |
| 120-47-8   | Ethyl paraben                   | chemicals in PCPs             | 166.2                              | 2.5          | 9.2          | 106.8                    | N.A.                                      | 6.0×10 <sup>3</sup>                  | 1440               |
| 99-76-3    | Methyl paraben                  | chemicals in PCPs             | 152.2                              | 2.0          | 8.6          | 101.1                    | N.A.                                      | 1.6×10 <sup>5</sup>                  | 1440               |
| 94-26-8    | Butyl paraben                   | chemicals in PCPs             | 194.2                              | 3.6          | 10.0         | 64.4                     | N.A.                                      | 3.9×10 <sup>4</sup>                  | 2                  |
| 62-73-7    | Dichlorvos                      | pesticide/antimicro           | 221.0                              | 1.4          | 6.1          | 31.4                     | N.A.                                      | 2.2×10 <sup>4</sup>                  | 30                 |
| 134-62-3   | N,N-Diethyl-3-methyl-benzamide  | pesticide/antimicro           | 191.3                              | 2.2          | 8.3          | 67                       | N.A.                                      | 3.0×10 <sup>4</sup>                  | 30                 |
| 56-72-4    | Coumaphos                       | pesticide/antimicro           | 362.8                              | 4.1          | 10.0         | 42.4                     | N.A.                                      | 1.2×10 <sup>2</sup>                  | 30                 |
| 56-38-2    | Parathion                       | pesticide/antimicro           | 291.3                              | 3.8          | 8.7          | 71.2                     | N.A.                                      | 1.2×10 <sup>2</sup>                  | 30                 |
| 3380-34-5  | Triclosan                       | pesticide/antimicro           | 289.6                              | 4.8          | 11.5         | 65.1                     | N.A.                                      | 4.1×10 <sup>5</sup>                  | 2                  |
| 106-46-7   | 1,4-Dichlorobenzene             | pesticide/antimicro           | 147.0                              | 3.4          | 4.5          | 3539.4                   | N.A.                                      | 8.7×10 <sup>3</sup>                  | 30                 |
| 121-75-5   | Malathion                       | pesticide/antimicro           | 330.4                              | 2.4          | 9.6          | 146.3                    | N.A.                                      | 8.7×10 <sup>3</sup>                  | 30                 |
| 333-41-5   | Diazinon                        | pesticide/antimicro           | 304.4                              | 3.8          | 9.1          | 64.4                     | N.A.                                      | 1.2×10 <sup>2</sup>                  | 30                 |
| 298-00-0   | Parathion-methyl                | pesticide/antimicro           | 263.2                              | 2.9          | 8.2          | 90.6                     | N.A.                                      | 1.2×10 <sup>2</sup>                  | 30                 |
| 68359-37-5 | Cyfluthrin                      | pesticide/antimicro           | 434.3                              | 6.0          | 11.9         | 33.4                     | N.A.                                      | 1.4×10 <sup>3</sup>                  | 30                 |
| 52918-63-5 | Deltamethrin                    | pesticide/antimicro           | 505.2                              | 6.2          | 9.9          | 33.1                     | N.A.                                      | 5.8×10 <sup>2</sup>                  | 30                 |
| 1912-24-9  | Atrazine                        | pesticide/antimicro           | 215.7                              | 2.6          | 9.6          | 68.6                     | N.A.                                      | 6.4×10 <sup>2</sup>                  | 30                 |
| 3383-96-8  | Temephos                        | pesticide/antimicro           | 466.5                              | 6.0          | 13.1         | 48.4                     | N.A.                                      | 1.2×10 <sup>2</sup>                  | 30                 |
| 60-51-5    | Dimethoate                      | pesticide/antimicro           | 229.3                              | 0.8          | 8.8          | 79.2                     | N.A.                                      | 1.2×10 <sup>2</sup>                  | 30                 |
| 52645-53-1 | Permethrin                      | pesticide/antimicro           | 391.3                              | 6.5          | 10.6         | 34                       | N.A.                                      | 2.6×10 <sup>4</sup>                  | 30                 |

| CAS#       | Name                           | Usage category <sup>(1)</sup> | Chemical properties <sup>(2)</sup> |              |              |                          | Emission rate <sup>(3)</sup>       | Application rate                       |                    |
|------------|--------------------------------|-------------------------------|------------------------------------|--------------|--------------|--------------------------|------------------------------------|----------------------------------------|--------------------|
|            |                                |                               | MW<br>(g mol <sup>-1</sup> )       | log $K_{OW}$ | log $K_{OA}$ | HL <sub>Air</sub><br>(h) | $ER_{Air}$<br>(g h <sup>-1</sup> ) | Apparent $AR$<br>(ng h <sup>-1</sup> ) | $t_{exp}$<br>(min) |
| 100-02-7   | 4-Nitrophenol                  | pesticide/antimicro           | 139.1                              | 1.9          | 9.7          | 976.4                    | N.A.                               | 1.2×10 <sup>2</sup>                    | 30                 |
| 1563-66-2  | Carbofuran                     | pesticide/antimicro           | 221.3                              | 2.3          | 9.2          | 77                       | N.A.                               | 1.2×10 <sup>2</sup>                    | 30                 |
| 52315-07-8 | Cypermethrin                   | pesticide/antimicro           | 416.3                              | 6.6          | 11.7         | 33.2                     | N.A.                               | 1.5×10 <sup>4</sup>                    | 30                 |
| 141-66-2   | Dicrotophos                    | pesticide/antimicro           | 237.2                              | 0.0          | 8.7          | 40.4                     | N.A.                               | 1.2×10 <sup>2</sup>                    | 30                 |
| 94-75-7    | 2,4-Dichlorophenoxyacetic acid | pesticide/antimicro           | 221                                | 2.8          | 8.6          | 133.1                    | N.A.                               | 4.3×10 <sup>3</sup>                    | 30                 |
| 85-68-7    | Butyl benzyl phthalate         | plasticizer                   | 312.4                              | 4.7          | 9.0          | 80.9                     | 5.3×10 <sup>5</sup>                | 0                                      | 0                  |
| 84-61-7    | Dicyclohexyl phthalate         | plasticizer                   | 330.4                              | 6.2          | 11.6         | 80.9                     | 7.0×10 <sup>3</sup>                | 0                                      | 0                  |
| 84-69-5    | Diisobutyl phthalate           | plasticizer                   | 278.4                              | 4.1          | 8.4          | 78.7                     | 2.0×10 <sup>4</sup>                | 0                                      | 0                  |
| 117-84-0   | Dioctyl phthalate              | plasticizer                   | 390.6                              | 8.1          | 11.7         | 65.5                     | 9.1×10 <sup>5</sup>                | 0                                      | 0                  |
| 84-66-2    | Diethyl phthalate              | plasticizer                   | 222.2                              | 2.4          | 7.0          | 126                      | 1.6×10 <sup>5</sup>                | 0                                      | 0                  |
| 131-11-3   | Dimethyl phthalate             | plasticizer                   | 194.2                              | 1.6          | 6.7          | 18.9                     | 5.5×10 <sup>4</sup>                | 0                                      | 0                  |
| 84-74-2    | Dibutyl phthalate              | plasticizer                   | 278.4                              | 4.5          | 8.6          | 78.7                     | 8.9×10 <sup>4</sup>                | 0                                      | 0                  |
| 131-70-4   | Monobutyl phthalate            | plasticizer                   | 222.2                              | 2.8          | 10.0         | 122.3                    | 88                                 | 0                                      | 0                  |
| 117-81-7   | Di(2-ethylhexyl) phthalate     | plasticizer                   | 390.6                              | 7.6          | 12.6         | 55.8                     | 2.0×10 <sup>8</sup>                | 0                                      | 0                  |
| 80-05-7    | Bisphenol A                    | plasticizer                   | 228.3                              | 3.3          | 12.7         | 69.1                     | 8.9×10 <sup>4</sup>                | 0                                      | 0                  |

MW: molar mass;  $K_{OW}$ : octanol-water partition coefficient;  $K_{OA}$ : octanol-air partition coefficient, HL<sub>Air</sub>: degradation half-life in air;  $ER_{Air}$ : emission rate to air;  $AR$ : application rate onto skin;  $t_{exp}$ : application duration.

- Notes:** (i) According to product categories defined in Isaacs et al.<sup>4</sup>;  
(2) Calculated by the USEPA Estimation Program Interface (EPI) Suite.  
(3) Calculated using a method modified from Litter et al.<sup>5</sup>

$$ER = A_{\text{material}} \cdot MTC_A \cdot (Z_{\text{gas}} + v_{\text{particle}} \cdot Z_{\text{particle}}) \cdot f_0$$

Where,  $A_{\text{material}}$  is the area of plastic material (in m<sup>2</sup>; assumed to be the area of vinyl floor in this study);

$MTC_A$  is the air-side mass transfer coefficient of a chemical (in  $\text{m h}^{-1}$ ), which is simply calculated using an empirical equation:

$$MTC_A = \frac{0.558}{MW^{0.65}} \cdot \frac{1}{\delta},$$

in which  $\delta$  is the thickness of air boundary layer (0.005 m)

$Z_{\text{gas}}$  is Z-value of a chemical in gaseous phase (in  $\text{mol m}^{-3} \text{ Pa}^{-1}$ ),  $Z_{\text{gas}} = 1/(R \cdot T)$ ;

$v_{\text{particle}}$  is volumetric fraction of total suspended particles in the indoor air, converted from the mass concentration of total suspended particles;

$Z_{\text{particle}}$  is Z-value of a chemical in particulate phase (in  $\text{mol m}^{-3} \text{ Pa}^{-1}$ ),  $Z_{\text{particle}} = K_{\text{PG}}/(R \cdot T)$ , in which the particle-gas partition coefficient  $K_{\text{PG}}$  is calculated in accordance with Harner and Bidleman;<sup>1</sup>

$f_0$  is the fugacity in the air immediately adjacent to product surface (in Pa), which is given by

$$f_0 = \min\left(\frac{C_{\text{material}}}{Z_{\text{material}}}, VP\right), \text{ in which } C_{\text{material}} \text{ is chemical concentration in product material (in } \text{mol m}^{-3}\text{; converted from the chemical}$$

weight fraction),  $Z_{\text{material}}$  is fugacity capacity of article material (in  $\text{mol m}^{-3} \text{ Pa}^{-1}$ ; calculated based on the material-air partition coefficient) and  $VP$  is vapor pressure of the chemical (in Pa).



**Table S4** Sensitivities of modeled uptake rates of chemicals in personal care products to selected input parameters

Sensitivity ( $S$ ) is defined as the percentage change of a model output,  $\partial Y/Y$ , with respect to the percentage perturbation in an input parameter,  $\partial X/X$ , near its baseline value of  $X_0$  (10% above and below the baseline value) with other parameters fixed, i.e.,

$$S = \left. \frac{\partial Y/Y}{\partial X/X} \right|_{X=X_0} = \frac{1}{20\%} \cdot \frac{Y_{X=X_0 \cdot 110\%} - Y_{X=X_0 \cdot 90\%}}{Y_{X=X_0}}$$

| CAS#          | Sensitivity          |                      |                      |                      |                      |                      |                      |
|---------------|----------------------|----------------------|----------------------|----------------------|----------------------|----------------------|----------------------|
|               | 90-15-3              | 131-57-7             | 91-20-3              | 94-13-3              | 120-47-8             | 99-76-3              | 94-26-8              |
| $K_{OW}$      | -0.12                | -0.62                | -0.76                | -0.25                | -0.21                | -0.43                | -0.22                |
| $K_{OA}$      | 0.057                | 0.004                | 0.93                 | 0.014                | 0.015                | 0.016                | 0.006                |
| $HL_{Air}$    | $7.3 \times 10^{-4}$ | $4.7 \times 10^{-6}$ | $6.0 \times 10^{-4}$ | $4.5 \times 10^{-5}$ | $2.5 \times 10^{-5}$ | $1.2 \times 10^{-5}$ | $1.3 \times 10^{-5}$ |
| $ER_{Air}$    | 0                    | 0                    | 0                    | 0                    | 0                    | 0                    | 0                    |
| Apparent $AR$ | 1                    | 1                    | 1                    | 1                    | 1                    | 1                    | 1                    |

$K_{OW}$ : octanol-water partition coefficient;  $K_{OA}$ : octanol-air partition coefficient,  $HL_{Air}$ : degradation half-life in air;  $ER_{Air}$ : emission rate to air;  $AR$ : application rate onto skin.

**Table S5** Information on 131 chemicals in Cases 2 and 3

| No. | CAS#        | Name                                 | MW<br>(g mol <sup>-1</sup> ) | logK <sub>OW</sub> | logK <sub>OA</sub> | HL <sub>Air</sub><br>(h) | HL <sub>Human</sub><br>(h) | OED<br>(mg kg <sup>-1</sup> d <sup>-1</sup> ) |
|-----|-------------|--------------------------------------|------------------------------|--------------------|--------------------|--------------------------|----------------------------|-----------------------------------------------|
| 1   | 92-87-5     | Benzidine                            | 184.2                        | 1.3                | 10.0               | 11.4                     | 3.2                        | 3.3                                           |
| 2   | 10605-21-7  | methyl 1H-benzimidazol-2-ylcarbamate | 191.2                        | 1.5                | 10.6               | 8.7                      | 1.6                        | 11.4                                          |
| 3   | 101-80-4    | 4,4'-Oxydianiline                    | 200.2                        | 1.4                | 10.6               | 8.8                      | 51.1                       | 0.4                                           |
| 4   | 101-54-2    | N-Phenyl-1,4-benzenediamine          | 184.2                        | 1.8                | 9.6                | 8.8                      | 8.5                        | 2.9                                           |
| 5   | 119-93-7    | o-Tolidine                           | 212.3                        | 2.3                | 10.9               | 9.3                      | 7.1                        | 0.04                                          |
| 6   | 94-13-3     | Propylparaben                        | 180.2                        | 3.0                | 9.6                | 124.4                    | 2.5                        | 27.3                                          |
| 7   | 99-59-2     | 2-methoxy-5-nitroaniline             | 168.2                        | 1.5                | 9.2                | 195.2                    | 18.3                       | 0.6                                           |
| 8   | 1912-24-9   | Atrazine                             | 215.7                        | 2.6                | 9.6                | 64                       | 31.6                       | 0.4                                           |
| 9   | 60-09-3     | 4-Aminoazobenzene                    | 197.2                        | 3.4                | 10.1               | 40.3                     | 7.2                        | 1.1                                           |
| 10  | 120-47-8    | Ethylparaben                         | 166.2                        | 2.5                | 9.2                | 139.2                    | 2.5                        | 48.2                                          |
| 11  | 63-25-2     | Carbaryl                             | 201.2                        | 2.4                | 9.2                | 67.3                     | 3.5                        | 62.7                                          |
| 12  | 94-26-8     | Butylparaben                         | 194.2                        | 3.6                | 10.0               | 113.1                    | 2.5                        | 51.1                                          |
| 13  | 119515-38-7 | Icaridin                             | 229.3                        | 2.6                | 11.5               | 31.2                     | 1.6                        | 69.7                                          |
| 14  | 1563-66-2   | Carbofuran                           | 221.3                        | 2.3                | 9.2                | 67.3                     | 1.8                        | 0.1                                           |
| 15  | 120-32-1    | Clorophene                           | 218.7                        | 3.6                | 10.6               | 98.5                     | 4.4                        | 0.2                                           |
| 16  | 21725-46-2  | Cyanazine                            | 240.7                        | 2.2                | 12.2               | 188.1                    | 134.4                      | 0.7                                           |
| 17  | 99-76-3     | Methylparaben                        | 152.2                        | 2.0                | 8.8                | 158.2                    | 1.8                        | 4                                             |
| 18  | 102-06-7    | 1,3-Diphenylguanidine                | 211.3                        | 2.9                | 12.4               | 20.5                     | 16.5                       | 0.2                                           |
| 19  | 119-90-4    | 3,3'-Dimethoxybenzidine              | 244.3                        | 1.8                | 12.9               | 13                       | 7.1                        | 1                                             |
| 20  | 23103-98-2  | Pirimicarb                           | 238.3                        | 1.7                | 9.2                | 11.6                     | 1.2                        | 3.4                                           |
| 21  | 97-54-1     | Isoeugenol                           | 164.2                        | 3.0                | 9.0                | 20.7                     | 0.5                        | 1.6                                           |
| 22  | 110235-47-7 | Mepanipyrim                          | 223.3                        | 3.3                | 9.5                | 8.9                      | 14.4                       | 0.8                                           |
| 23  | 838-88-0    | 4,4'-Methylene bis(2-methylaniline)  | 226.3                        | 3.3                | 11.8               | 8.7                      | 12.3                       | 4                                             |
| 24  | 17804-35-2  | Benomyl                              | 290.3                        | 2.1                | 11.8               | 8.2                      | 4                          | 4.7                                           |

| No. | CAS#        | Name                                        | MW<br>(g mol <sup>-1</sup> ) | logK <sub>OW</sub> | logK <sub>OA</sub> | HL <sub>Air</sub><br>(h) | HL <sub>Human</sub><br>(h) | OED<br>(mg kg <sup>-1</sup> d <sup>-1</sup> ) |
|-----|-------------|---------------------------------------------|------------------------------|--------------------|--------------------|--------------------------|----------------------------|-----------------------------------------------|
| 25  | 1401-55-4   | Tannic acid                                 | 636.5                        | -0.2               | 17.7               | 6.5                      | 6.3                        | 0.001                                         |
| 26  | 121-00-6    | 2-tert-Butyl-4-methoxy-phenol               | 180.3                        | 3.5                | 9.0                | 48.5                     | 0.5                        | 5.3                                           |
| 27  | 77-09-8     | Phenolphthalein                             | 318.3                        | 2.4                | 15.8               | 20.8                     | 7.7                        | 0.6                                           |
| 28  | 533-74-4    | Dazomet                                     | 162.3                        | 0.6                | 8.3                | 6.1                      | 12.3                       | 7.8                                           |
| 29  | 25606-41-1  | Propamocarb hydrochloride                   | 188.3                        | 1.1                | 8.3                | 17.7                     | 2.8                        | 27.3                                          |
| 30  | 548-62-9    | Hexamethyl-p-rosaniline chloride            | 408.0                        | 0.5                | 14.4               | 3.9                      | 7.9                        | 0.001                                         |
| 31  | 26530-20-1  | Octhilinone                                 | 213.3                        | 2.5                | 8.5                | 44.5                     | 4.6                        | 0.4                                           |
| 32  | 35554-44-0  | Imazalil                                    | 297.2                        | 3.8                | 10.8               | 20.6                     | 33.5                       | 0.00001                                       |
| 33  | 134-62-3    | DEET                                        | 191.3                        | 2.2                | 8.3                | 69.2                     | 1.7                        | 22.9                                          |
| 34  | 732-11-6    | Phosmet                                     | 317.3                        | 2.8                | 9.2                | 11.5                     | 8.6                        | 1.8                                           |
| 35  | 91-59-8     | 2-Naphthylamine                             | 143.2                        | 2.3                | 7.8                | 8.8                      | 1.9                        | 2                                             |
| 36  | 107534-96-3 | Tebuconazole                                | 307.8                        | 3.7                | 11.9               | 152.5                    | 62.3                       | 0.02                                          |
| 37  | 121-14-2    | 2,4-Dinitrotoluene                          | 182.1                        | 2.0                | 7.6                | 8122                     | 2                          | 0.1                                           |
| 38  | 2634-33-5   | 1,2-Benzisothiazolin-3-one                  | 151.2                        | 0.6                | 7.2                | 103.2                    | 2.9                        | 0.1                                           |
| 39  | 34590-94-8  | Propanol, 1 (or 2)-(2-methoxymethylethoxy)- | 148.2                        | -0.4               | 7.0                | 45.8                     | 2.7                        | 7.4                                           |
| 40  | 91-53-2     | Ethoxyquin                                  | 217.3                        | 3.9                | 8.9                | 13.6                     | 14.5                       | 1.2                                           |
| 41  | 122-99-6    | Phenoxyethanol                              | 138.2                        | 1.2                | 6.9                | 53.6                     | 3.3                        | 0.2                                           |
| 42  | 120-71-8    | p-Cresidine                                 | 137.2                        | 1.7                | 7.0                | 8.7                      | 2.6                        | 26.7                                          |
| 43  | 98-54-4     | 4-tert-Butylphenol                          | 150.2                        | 3.3                | 7.6                | 43.1                     | 4.7                        | 11.2                                          |
| 44  | 77-40-7     | Bisphenol B                                 | 242.3                        | 4.1                | 13.4               | 21.4                     | 9.6                        | 0.3                                           |
| 45  | 91-64-5     | Coumarin                                    | 146.2                        | 1.4                | 6.8                | 132.9                    | 3.1                        | 8.6                                           |
| 46  | 110-26-9    | N,N'-Methylenebis(acrylamide)               | 154.2                        | -1.5               | 5.8                | 38.8                     | 1.7                        | 94.3                                          |
| 47  | 99-71-8     | 4-(Butan-2-yl)phenol                        | 150.2                        | 3.1                | 7.3                | 39.7                     | 5.6                        | 8.9                                           |
| 48  | 106-44-5    | 4-Methylphenol                              | 108.1                        | 1.9                | 6.3                | 37.2                     | 3.6                        | 30.6                                          |
| 49  | 95-48-7     | 2-Methylphenol                              | 108.1                        | 2.0                | 6.3                | 41.7                     | 0.6                        | 30.7                                          |

| No. | CAS#        | Name                                   | MW<br>(g mol <sup>-1</sup> ) | logK <sub>OW</sub> | logK <sub>OA</sub> | HL <sub>Air</sub><br>(h) | HL <sub>Human</sub><br>(h) | OED<br>(mg kg <sup>-1</sup> d <sup>-1</sup> ) |
|-----|-------------|----------------------------------------|------------------------------|--------------------|--------------------|--------------------------|----------------------------|-----------------------------------------------|
| 50  | 156052-68-5 | Zoxamide                               | 336.7                        | 3.8                | 12.6               | 163                      | 167.1                      | 0.00005                                       |
| 51  | 101-61-1    | 4,4'-methylenebis(N,N-dimethylaniline) | 254.4                        | 4.4                | 9.7                | 8.5                      | 0.4                        | 0.2                                           |
| 52  | 88-85-7     | Dinoseb                                | 240.2                        | 3.6                | 8.3                | 433.9                    | 28.4                       | 0.001                                         |
| 53  | 131-17-9    | Diallyl phthalate                      | 246.3                        | 3.2                | 8.0                | 31.4                     | 1.3                        | 0.03                                          |
| 54  | 67747-09-5  | Prochloraz                             | 376.7                        | 4.1                | 10.3               | 22.4                     | 507.5                      | 0.04                                          |
| 55  | 86-30-6     | N-nitrosodiphenylamine                 | 198.2                        | 3.1                | 7.4                | 70.5                     | 7.4                        | 1.7                                           |
| 56  | 80-46-6     | 4-(2-methylbutan-2-yl)phenol           | 164.3                        | 3.9                | 8.0                | 41.9                     | 6.3                        | 0.2                                           |
| 57  | 119-61-9    | Benzophenone                           | 182.2                        | 3.2                | 7.3                | 492.4                    | 3                          | 0.5                                           |
| 58  | 148-24-3    | 8-Hydroxyquinoline                     | 145.2                        | 1.9                | 6.5                | 8.8                      | 4                          | 1.2                                           |
| 59  | 91-22-5     | Quinoline                              | 129.2                        | 2.0                | 6.2                | 150.9                    | 3.1                        | 161.5                                         |
| 60  | 606-20-2    | 2,6-Dinitrotoluene                     | 182.1                        | 2.1                | 6.6                | 8122                     | 4.3                        | 1                                             |
| 61  | 13674-87-8  | TDCPP                                  | 430.9                        | 3.7                | 10.6               | 96.8                     | 3796.5                     | 0.05                                          |
| 62  | 56-38-2     | Parathion                              | 291.3                        | 3.8                | 8.7                | 19                       | 27.4                       | 0.02                                          |
| 63  | 97-53-0     | Eugenol                                | 164.2                        | 2.3                | 6.4                | 26.9                     | 0.4                        | 44.1                                          |
| 64  | 576-26-1    | 2,6-Dimethylphenol                     | 122.2                        | 2.4                | 5.9                | 26.6                     | 2.1                        | 18.1                                          |
| 65  | 87-62-7     | 2,6-Dimethylaniline                    | 121.2                        | 1.8                | 5.8                | 10.8                     | 2.1                        | 0.03                                          |
| 66  | 93-15-2     | Methyleugenol                          | 178.2                        | 3.0                | 6.7                | 23.3                     | 1.4                        | 39                                            |
| 67  | 94-59-7     | Safrole                                | 162.2                        | 3.5                | 6.9                | 23.1                     | 7.4                        | 6.1                                           |
| 68  | 72490-01-8  | Fenoxycarb                             | 301.4                        | 4.3                | 12.1               | 26.8                     | 60.8                       | 0.02                                          |
| 69  | 90-04-0     | 2-Anisidine                            | 123.2                        | 1.2                | 5.6                | 18.6                     | 3.7                        | 0.8                                           |
| 70  | 126-73-8    | Tributyl phosphate                     | 266.3                        | 4.0                | 8.2                | 22.2                     | 8.4                        | 0.02                                          |
| 71  | 584-79-2    | d-cis,trans-Allethrin                  | 302.4                        | 4.8                | 10.2               | 7.9                      | 4.8                        | 0.3                                           |
| 71  | 28434-00-6  | S-Bioallethrin                         | 302.4                        | 4.8                | 10.2               | 7.9                      | 4.8                        | 0.1                                           |
| 73  | 76-87-9     | Fentin hydroxide                       | 367.0                        | 3.5                | 8.3                | 292.2                    | 10.4                       | 0.00002                                       |
| 74  | 924-16-3    | N-nitrosodi-n-butylamine               | 158.3                        | 2.6                | 5.9                | 65.2                     | 5.5                        | 185.1                                         |

| No. | CAS#       | Name                                 | MW<br>(g mol <sup>-1</sup> ) | logK <sub>OW</sub> | logK <sub>OA</sub> | HL <sub>Air</sub><br>(h) | HL <sub>Human</sub><br>(h) | OED<br>(mg kg <sup>-1</sup> d <sup>-1</sup> ) |
|-----|------------|--------------------------------------|------------------------------|--------------------|--------------------|--------------------------|----------------------------|-----------------------------------------------|
| 75  | 298-02-2   | Phorate                              | 260.4                        | 3.6                | 7.3                | 7                        | 34.7                       | 0.03                                          |
| 76  | 29091-21-2 | Prodiamine                           | 350.3                        | 4.1                | 8.5                | 72.9                     | 4.4                        | 0.8                                           |
| 77  | 83-79-4    | Rotenone                             | 394.4                        | 4.1                | 15.4               | 5.3                      | 11.2                       | 0.01                                          |
| 78  | 84-74-2    | Di-n-butylphthalate                  | 278.4                        | 4.5                | 8.6                | 188.7                    | 1.9                        | 0.05                                          |
| 79  | 105-99-7   | Dibutyl hexanedioate                 | 258.4                        | 4.3                | 8.0                | 138.1                    | 1.1                        | 1659.3                                        |
| 80  | 58-89-9    | Hexachlorocyclohexane (gamma isomer) | 290.8                        | 4.1                | 7.8                | 9212.5                   | 21                         | 0.01                                          |
| 81  | 128-39-2   | 2,6-Di-tert-butylphenol              | 206.3                        | 4.9                | 8.7                | 35.6                     | 3.5                        | 19.4                                          |
| 82  | 1861-32-1  | Chlorthal-dimethyl                   | 332.0                        | 4.3                | 8.3                | 3968.7                   | 136.5                      | 31.7                                          |
| 83  | 1119-40-0  | Dimethyl glutarate                   | 160.2                        | 0.6                | 5.2                | 530.4                    | 0.6                        | 1                                             |
| 84  | 129-00-0   | Pyrene                               | 202.3                        | 4.9                | 8.2                | 35                       | 8.3                        | 16.5                                          |
| 85  | 101-86-0   | 2-Benzylideneoctanal                 | 216.3                        | 4.8                | 8.2                | 31.8                     | 17.1                       | 3                                             |
| 86  | 120-12-7   | Anthracene                           | 178.2                        | 4.5                | 7.1                | 43.8                     | 5.1                        | 2.1                                           |
| 87  | 98-95-3    | Nitrobenzene                         | 123.1                        | 1.9                | 4.9                | 12502.7                  | 26.8                       | 36.2                                          |
| 88  | 115-86-6   | Triphenyl phosphate                  | 326.3                        | 4.6                | 8.5                | 161.4                    | 13.1                       | 0.001                                         |
| 89  | 72-43-5    | Methoxychlor                         | 345.7                        | 5.1                | 10.2               | 32.7                     | 285.5                      | 9.5                                           |
| 90  | 206-44-0   | Fluoranthene                         | 202.3                        | 5.2                | 8.6                | 59.9                     | 3.1                        | 0.9                                           |
| 91  | 140-66-9   | 4-(1,1,3,3-Tetramethylbutyl)phenol   | 206.3                        | 5.3                | 9                  | 41.3                     | 6                          | 1.2                                           |
| 92  | 7696-12-0  | Tetramethrin                         | 331.4                        | 4.7                | 8.9                | 13.7                     | 2.7                        | 84.4                                          |
| 93  | 208-96-8   | Acenaphthylene                       | 152.2                        | 3.9                | 6.3                | 15.9                     | 5.3                        | 5.1                                           |
| 94  | 87-86-5    | Pentachlorophenol                    | 266.3                        | 5.1                | 11.1               | 3179.7                   | 31.6                       | 1.1                                           |
| 95  | 1806-26-4  | 4-Octylphenol                        | 206.3                        | 5.5                | 9.2                | 34.8                     | 4.9                        | 1.6                                           |
| 96  | 2921-88-2  | Chlorpyrifos                         | 350.6                        | 5.0                | 8.9                | 19.1                     | 206.3                      | 1.8                                           |
| 97  | 92-52-4    | Biphenyl                             | 154.2                        | 4.0                | 5.9                | 243.1                    | 1.9                        | 66.9                                          |
| 98  | 91-20-3    | Naphthalene                          | 128.2                        | 3.3                | 5.0                | 81                       | 3.1                        | 12.5                                          |
| 99  | 7173-51-5  | Didecyl dimethyl ammonium chloride   | 362.1                        | 4.7                | 12.2               | 37.8                     | 5.6                        | 0.004                                         |

| No. | CAS#       | Name                                                           | MW<br>(g mol <sup>-1</sup> ) | logK <sub>OW</sub> | logK <sub>OA</sub> | HL <sub>Air</sub><br>(h) | HL <sub>Human</sub><br>(h) | OED<br>(mg kg <sup>-1</sup> d <sup>-1</sup> ) |
|-----|------------|----------------------------------------------------------------|------------------------------|--------------------|--------------------|--------------------------|----------------------------|-----------------------------------------------|
| 100 | 7378-99-6  | N,N-Dimethyloctylamine                                         | 157.3                        | 3.5                | 5.4                | 20                       | 3.7                        | 119.1                                         |
| 101 | 1024-57-3  | Heptachlor epoxide, isomer B                                   | 389.3                        | 5.0                | 8.0                | 288.9                    | 10293.3                    | 0.02                                          |
| 102 | 56-55-3    | Benz[a]anthracene                                              | 228.3                        | 5.8                | 9.1                | 35                       | 8.3                        | 0.04                                          |
| 103 | 29420-49-3 | Potassium nonafluoro-1-butanesulfonate                         | 300.1                        | 1.8                | 5.1                | 12502.7                  | 752.9                      | 0.2                                           |
| 104 | 106-46-7   | 1,4-Dichlorobenzene                                            | 147.0                        | 3.4                | 4.4                | 5469.9                   | 37.7                       | 3.2                                           |
| 105 | 127-51-5   | 3-Buten-2-one, 3-methyl-4-(2,6,6-trimethyl-2-cyclohexen-1-yl)- | 206.3                        | 4.8                | 6.8                | 10.3                     | 10.1                       | 9.5                                           |
| 106 | 307-24-4   | Perfluorohexanoic acid                                         | 314.1                        | 3.5                | 4.4                | 3366.1                   | 602.6                      | 0.3                                           |
| 107 | 111-82-0   | Methyl laurate                                                 | 214.4                        | 5.4                | 6.3                | 132.7                    | 1.6                        | 10181.1                                       |
| 108 | 2795-39-3  | Heptadecafluorooctanesulfonic acid potassium salt              | 500.1                        | 4.5                | 4.8                | 12502.7                  | 41686.9                    | 0.0001                                        |
| 108 | 1763-23-1  | Perfluorooctane sulfonic acid                                  | 500.1                        | 4.5                | 4.8                | 12502.7                  | 41686.9                    | 0.0001                                        |
| 110 | 375-85-9   | Perfluoroheptanoic acid                                        | 364.1                        | 4.2                | 4.3                | 3366.1                   | 2082.4                     | 0.02                                          |
| 111 | 754-91-6   | Perfluorooctanesulfonamide                                     | 499.1                        | 5.8                | 3.9                | 10000                    | 147107.9                   | 0.03                                          |
| 112 | 3825-26-1  | Pentadecafluorooctanoic acid                                   | 414.1                        | 4.8                | 4.2                | 3366.1                   | 47863                      | 0.0007                                        |
| 112 | 335-67-1   | Perfluorooctanoic acid                                         | 414.1                        | 4.8                | 4.2                | 3366.1                   | 47863                      | 0.01                                          |
| 114 | 375-95-1   | Perfluorononanoic acid                                         | 464.1                        | 5.5                | 4.2                | 3366.1                   | 29108.2                    | 0.002                                         |
| 115 | 2058-94-8  | Perfluoroundecanoic acid                                       | 564.1                        | 6.8                | 4.1                | 3366.1                   | 406885.3                   | 0.01                                          |
| 116 | 335-76-2   | Perfluorodecanoic acid                                         | 514.1                        | 6.2                | 4.1                | 3366.1                   | 108828.8                   | 0.004                                         |
| 117 | 76-44-8    | Heptachlor                                                     | 373.3                        | 5.5                | 7.4                | 28.2                     | 10293.3                    | 17                                            |
| 118 | 97886-45-8 | Dithiopyr                                                      | 401.4                        | 4.8                | 11.6               | 245.8                    | 7.3                        | 0.3                                           |
| 119 | 205-99-2   | Benzo[b]fluoranthene                                           | 252.3                        | 5.8                | 10.4               | 94.3                     | 5.1                        | 0.003                                         |
| 120 | 72-54-8    | p,p'-DDD                                                       | 320.1                        | 6                  | 9.6                | 402.9                    | 762.3                      | 0.1                                           |
| 121 | 309-00-2   | Aldrin                                                         | 364.9                        | 6.5                | 9.2                | 26.7                     | 3006.5                     | 0.008                                         |
| 122 | 789-02-6   | o,p'-DDT                                                       | 354.5                        | 6.8                | 10.3               | 509.6                    | 2610                       | 0.1                                           |
| 123 | 50-29-3    | p,p'-DDT                                                       | 354.5                        | 6.9                | 10.4               | 509.6                    | 22908.7                    | 3.1                                           |

| No. | CAS#       | Name                                       | MW<br>(g mol <sup>-1</sup> ) | logK <sub>OW</sub> | logK <sub>OA</sub> | HL <sub>Air</sub><br>(h) | HL <sub>Human</sub><br>(h) | OED<br>(mg kg <sup>-1</sup> d <sup>-1</sup> ) |
|-----|------------|--------------------------------------------|------------------------------|--------------------|--------------------|--------------------------|----------------------------|-----------------------------------------------|
| 124 | 60-57-1    | Dieldrin                                   | 380.9                        | 5.5                | 11                 | 213.8                    | 9772.4                     | 0.02                                          |
| 124 | 72-20-8    | Endrin                                     | 380.9                        | 5.5                | 11                 | 213.8                    | 9772.4                     | 0.001                                         |
| 126 | 94-28-0    | Tri(ethylene glycol) bis(2-ethylhexanoate) | 402.6                        | 5.6                | 12.4               | 39.4                     | 0.6                        | 37.7                                          |
| 127 | 2385-85-5  | Mirex                                      | 545.6                        | 7.4                | 11.6               | 10000                    | 4842403.8                  | 0.0002                                        |
| 128 | 117-84-0   | Di-n-octyl phthalate                       | 390.6                        | 8.1                | 12.1               | 85                       | 1.9                        | 0.1                                           |
| 129 | 1843-05-6  | 2-Hydroxy-4-(octyloxy)benzophenone         | 326.4                        | 7                  | 12.3               | 8                        | 5.8                        | 8.9                                           |
| 130 | 71751-41-2 | Abamectin                                  | 873.1                        | 4.4                | 9.6                | 2.7                      | 215.7                      | 0.3                                           |
| 131 | 103-23-1   | Di(2-ethylhexyl)adipate                    | 370.6                        | 8.1                | 12.9               | 69                       | 2.6                        | 15.4                                          |

MW: Molar mass;  $K_{OW}$ : Octanol-water partition coefficient;  $K_{OA}$ : octanol-air partition coefficient, HL<sub>Air</sub>: degradation half-life in air; HL<sub>human</sub>: biotransformation half-life in human body; OED: oral equivalent dose.

**Text S1** Steady-state mass balance equations for compartments of hand, rest of skin, and human body

Hand:

$$\sum_{X=C,U,F,M} (D_{X-Ha} \cdot f_X) = (D_{clHa} + D_{moH} + D_{HaH} + D_{wH}) \cdot f_{Ha} \quad (\text{eq.S1})$$

Rest of skin:

$$D_{dis} \cdot f_A = (D_{dis} + D_{cls} + D_{SH} + D_{wH}) \cdot f_S \quad (\text{eq.S2})$$

Human body:

$$\underbrace{N_{inH}}_{\text{Ingestion}} + \underbrace{D_{ihH} \cdot f_A}_{\text{Inhalation}} + \underbrace{\sum_{Y=Ha,S} (D_{YH} \cdot f_Y)}_{\text{Dermal permeation}} + \underbrace{E_D \cdot D_{moH} \cdot f_{Ha}}_{\text{Non-dietary ingestion}} = (D_{reH} + D_{cH} + D_{urH} + D_{mH} + D_{gH}) \cdot f_H \quad (\text{eq.S3})$$



## Text S2 Algorithm for calculating absorption of direct skin application

The rate of chemicals applied being absorbed by human hands/skin ( $E$ ; ng h<sup>-1</sup>) is calculated by eq. S4

$$E = AR \cdot SF_{\text{lag}} \quad (\text{eq. S4})$$

whereby,

$AR$  is the rate of a chemical being applied to human hands/skin, i.e., an apparent application rate (ng h<sup>-1</sup>);  $SF_{\text{lag}}$  is a unitless scaling factor, which describes the fraction of a chemical that is truly absorbed by human hands/skin before removal due to a time lag in permeation.

### Calculation of the apparent application rate

In the real world, the application of a chemical-containing product on human hands or skin is usually an intermittent, as opposite to continuous, process. As a steady-state model, RAIDAR-ICE adopts an “equivalent” application rate, which averages the individual intermittent application rates over a given duration. RAIDAR-ICE considers two types of intermittent applications:

(i) The chemical-containing product is left on after application, such as a moisturizer or a sunscreen. The equivalent application rate is calculated by eq. S5:

$$AR_1 = M \cdot \left( \frac{1 + 2 + 3 + \dots + Freq}{Freq} \right) \cdot \frac{1}{24}, \quad (\text{eq. S5})$$

whereby,

$M$  is amount of a chemical being applied to human skin or hands per application (in ng);

$Freq$  is the times of applications per day (in d<sup>-1</sup>).

(ii) The chemical-containing product is washed off  $t_{\text{exp}}$  minutes after application, such as a hand soap or a shampoo. The equivalent application rate is calculated by eq. S6:

$$AR_2 = AR_1 \cdot \frac{Freq \cdot t_{\text{exp}}}{1440} \quad (\text{eq. S6})$$

whereby,

$t_{\text{exp}}$  is the duration of an application (in min), i.e., the time of exposure to the chemical until wash off.

Note: the model will generate a warning message in a conceptually unlikely scenario of  $Fr \times t_{\text{exp}} > 1440$ .

### Calculation of the scaling factor

Not all the chemical in an application can be completely absorbed by human hands/skin because skin permeation can be very slow for certain chemicals. Lag time ( $t_{lag}$ ) is defined as the minimum duration for a chemical applied to hands/skin to reach full steady-state absorption.<sup>6</sup> The  $t_{lag}$  values for hands (including palm and back) and skin are calculated as per Tibaldi et al.<sup>6</sup>

Let us start with a case of single, finite application, in which the amount of a chemical that cumulatively penetrates through skin increases from zero to a maximum (i.e., the steady-state absorption) during the lag-phase. In other words, the total absorbed fraction, which is characterized by a scaling factor  $SF_{lag}$ , increases from 0 to 100%. RAIDAR-ICE assumes that the increase in the total absorbed fraction is linear during the lag phase. While the real increase is likely not linear – it is perhaps sigmoidal or logarithmic – the difference in  $SF_{lag}$  is not overly large, and thus this simple assumption should be an acceptable first approximation.

In the case of continuous, infinite application, which is assumed by RAIDAR-ICE, the total absorption is an integral of absorptions in individual single, finite applications. Therefore, the total absorbed fraction can be viewed as the area under the curve of  $SF_{lag}$  in the case of a single, finite application. When the application duration ( $t_{exp}$ ) is greater than  $t_{lag}$ , the amount of product applied within  $t_{lag}$  minutes before removal can only be partially absorbed, while the amount of product applied within a window  $t_{exp} - t_{lag}$  can be 100% absorbed (Figure S1, panel a). Therefore,  $SF_{lag}$  is calculated as

$$SF_{lag} = \frac{2t_{exp} - t_{lag}}{2t_{exp}}, \text{ when } t_{lag} < t_{exp}$$

When the application duration ( $t_{exp}$ ) is shorter than  $t_{lag}$ , all applied amount can only be partially absorbed (Figure S1, panel b). Therefore,  $SF_{lag}$  is calculated as

$$SF_{lag} = \frac{1}{2} \cdot \frac{t_{exp}}{t_{lag}}, \text{ when } t_{lag} > t_{exp}$$

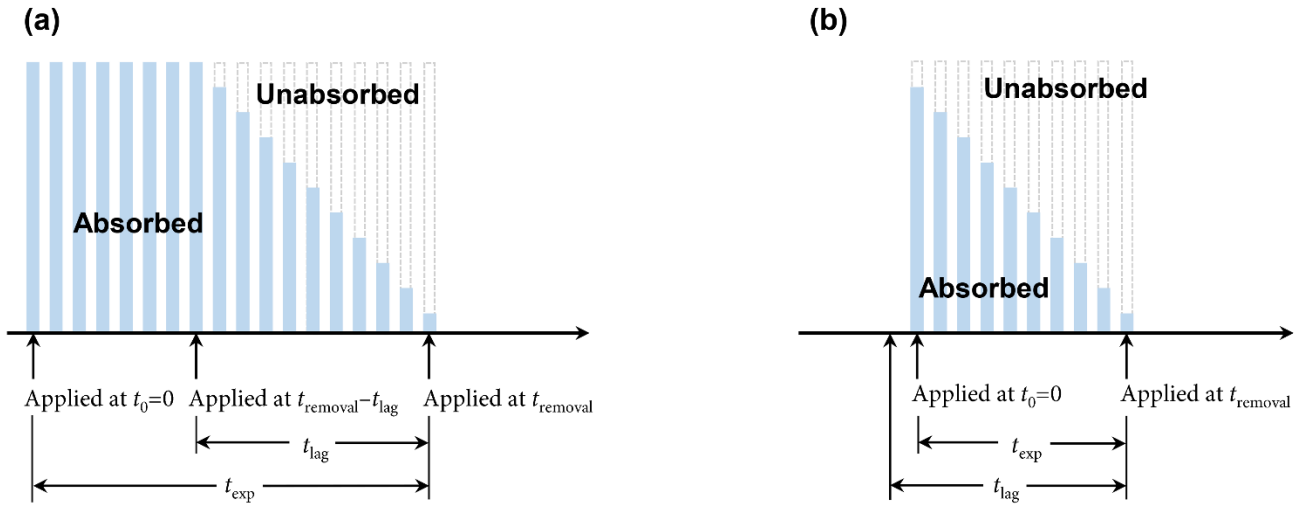

**Figure S1** Graphical illustration of the absorbed fraction (blue shadows) in the total applied amount (combined blue and white parts) over the application duration (between the start and the removal) under scenarios of (a) lag time ( $t_{lag}$ ) being shorter than application duration ( $t_{exp}$ ), and (b) lag time ( $t_{lag}$ ) being longer than application duration ( $t_{exp}$ ). The total applied amount over the application duration is an arbitrary unit.

**Figure S2** Relative importance of near-field exposure pathways in intake fractions of 131 chemicals in Case 2

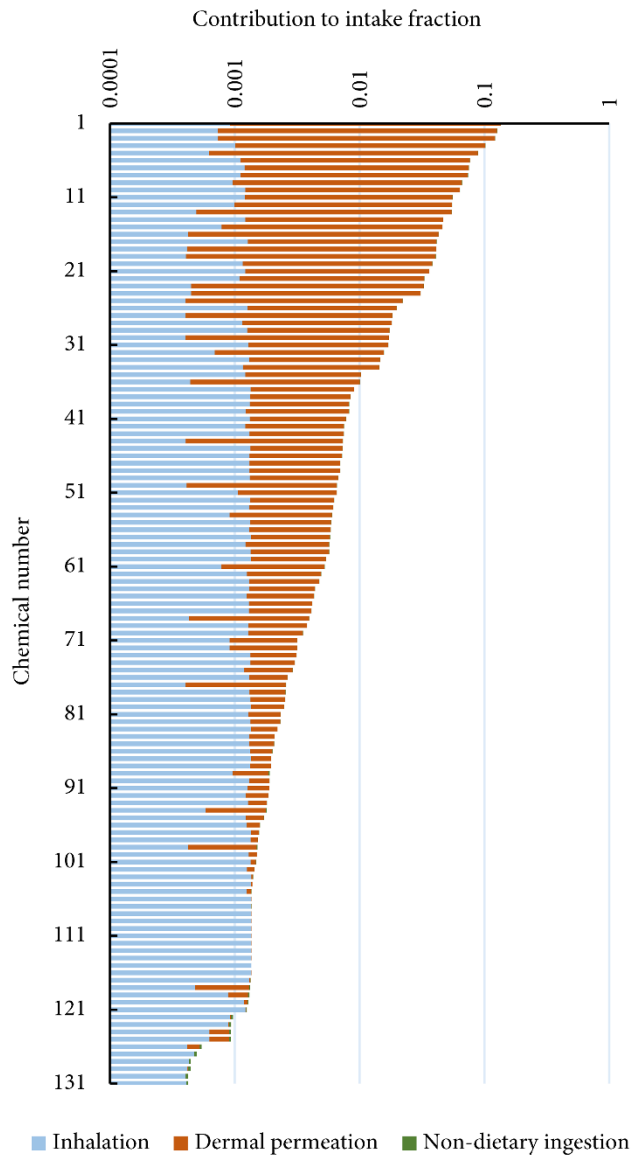

**Figure S3** Modeling population intake fraction (Tier 1  $iF$ s) on the coupled RAIDAR-ICE and RAIDAR models

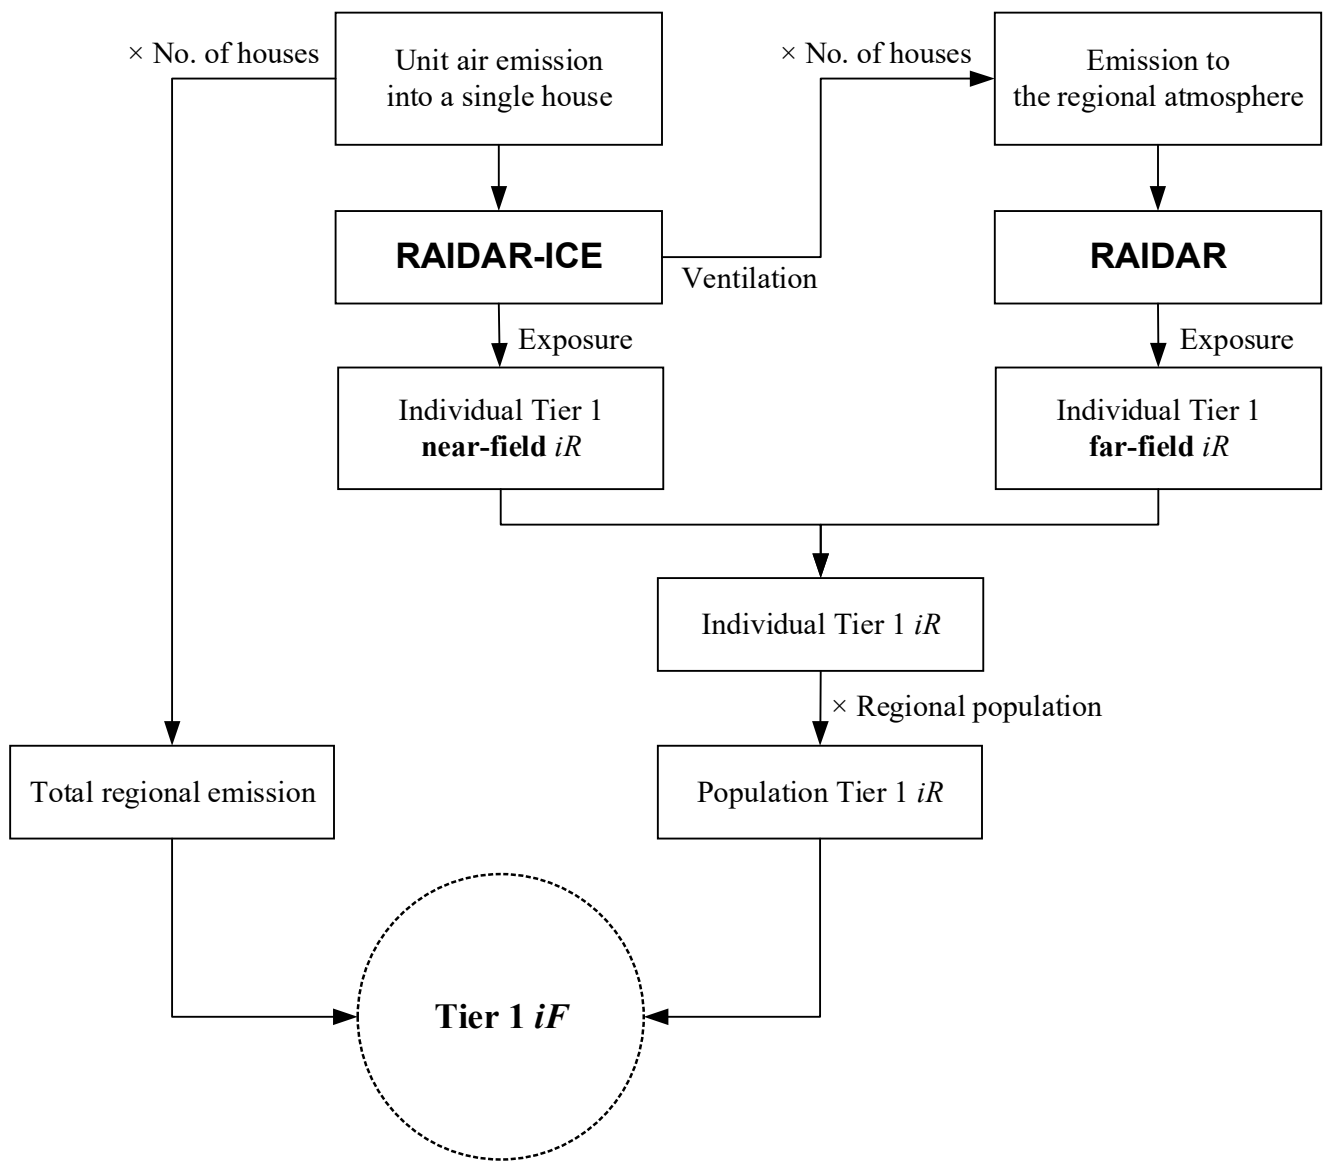

**Figure S4** Percentage contribution of diet to the population intake fractions of 131 chemicals in Case 3. Chemicals with a contribution greater than 90% are labeled. For names of the labeled chemicals, please see Table S5.

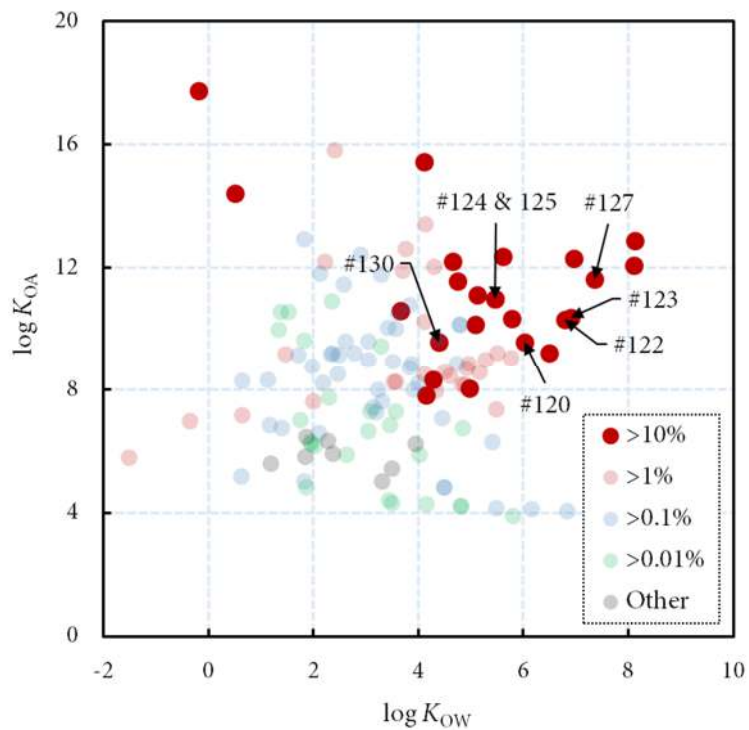

## References

1. Harner, T.; Bidleman, T. F., Octanol-air partition coefficient for describing particle/gas partitioning of aromatic compounds in urban air. *Environ. Sci. Technol.* **1998**, *32*, (10), 1494-1502.
2. Diamond, M. L.; Gingrich, S. E.; Fertuck, K.; McCarry, B. E.; Stern, G. A.; Billeck, B.; Grift, B.; Brooker, D.; Yager, T. D., Evidence for organic film on an impervious urban surface: characterization and potential teratogenic effects. *Environ. Sci. Technol.* **2000**, *34*, (14), 2900-2908.
3. ten Berge, W. QSARs for skin permeation of chemicals. <http://home.Wxs.Nl/~wtberge/qsarperm.html> (September 9),
4. Isaacs, K. K.; Glen, W. G.; Egeghy, P.; Goldsmith, M.-R.; Smith, L.; Vallero, D.; Brooks, R.; Grulke, C. M.; Özkaynak, H., SHEDS-HT: An integrated probabilistic exposure model for prioritizing exposures to chemicals with near-field and dietary sources. *Environ. Sci. Technol.* **2014**, *48*, (21), 12750-12759.
5. Little, J. C.; Weschler, C. J.; Nazaroff, W. W.; Liu, Z.; Cohen Hubal, E. A., Rapid methods to estimate potential exposure to semivolatile organic compounds in the indoor environment. *Environ. Sci. Technol.* **2012**, *46*, (20), 11171-11178.
6. Tibaldi, R.; ten Berge, W.; Drolet, D., Dermal absorption of chemicals: estimation by IH SkinPerm. *J. Occup. Environ. Hyg.* **2014**, *11*, (1), 19-31.
